# Supplementary material for: Vanadium(v) oxoanions in basic water solution: a simple oxidative system for the one pot selective conversion ofl-proline to pyrroline-2-carboxylate
Source: Royal Society of Chemistry journal article supplement (doi:10.1039/c7dt02702h), 2017-01-01

# Vanadium(V) Oxoanions in Basic Water Solution: a Simple Oxidative System for the One Pot Selective Conversion of L-Proline to Pyrroline-2-Carboxylate

Lorenzo Biancalana, Giada Tuci, Fabio Piccinelli, Fabio Marchetti, Marco Bortoluzzi, and Guido Pampaloni

## SUPPORTING INFORMATION

|                                                                                                                                                                                                                                                          | Page |
|----------------------------------------------------------------------------------------------------------------------------------------------------------------------------------------------------------------------------------------------------------|------|
| <b>Table S1.</b> Selected standard reduction potentials for V(V), Cr(VI) and Mn(VII) ions in aqueous solution.                                                                                                                                           | 2    |
| <b>Figure S1.</b> X-ray powder diffraction pattern of the precipitate from L-proline/ $\text{NH}_4\text{VO}_3$                                                                                                                                           | 3    |
| <b>Determination of pH as a function of the <math>\text{NH}_3/\text{V}</math> molar ratio in the <math>\text{NH}_4\text{VO}_3/\text{NH}_3</math> system</b>                                                                                              | 4    |
| <b>Figure S2.</b> Plot of pH as a function of $\text{NH}_3/\text{V}$ molar ratio.                                                                                                                                                                        |      |
| <b>Table S2.</b> Experimental optimization of L-pyrroline-2-carboxylate ( $\text{P2C}^-$ ) yield from the reaction of $\text{NH}_4\text{VO}_3$ with L-Proline.                                                                                           | 5    |
| <b>Analysis of vanadate species in the reaction mixture by <math>^{51}\text{V}</math> NMR spectroscopy.</b>                                                                                                                                              | 6-7  |
| <b>Figure S3.</b> $^{51}\text{V}$ NMR spectrum of a pH = 9.4 solution prepared with $\text{NH}_4\text{VO}_3$ ( $[\text{V}] = 0.1 \text{ M}$ ) and $\text{NH}_3$ ( $\text{NH}_3/\text{V}$ molar ratio = 1.0).                                             |      |
| <b>Table S3 and Figure S4.</b> Overlay of $^{51}\text{V}$ spectra at selected time intervals of the $\text{NH}_4\text{VO}_3/\text{L-Proline}/\text{NH}_3$ reaction system and corresponding pH and $^{13}\text{C}$ NMR yield of pyrroline-2-carboxylate. |      |
| <b>Calculation of a plausible reduction potential for the V(V)/V(IV) couple under the experimental conditions used in the reactions</b>                                                                                                                  | 8    |
| <b>Table S4.</b> Thermodynamic data on $[\text{V}_4\text{O}_{12}]^{4-}_{(\text{aq})}$ and $[\text{V}_4\text{O}_9]^{2-}_{(\text{aq})}$ ions in aqueous solution.                                                                                          |      |
| <b>Figure S5.</b> DFT-optimized structure of intermediates <b>C</b> and <b>C-is2</b>                                                                                                                                                                     | 9    |
| <b>Figure S6.</b> DFT-optimized structure of $[\text{V}_4\text{O}_{10}(\text{OH})_2(\text{sarcosinate})\cdot\text{H}_2\text{O}]^{3-}\cdot 10$                                                                                                            |      |
| <b>Figure S7.</b> Relative Gibbs energy values ( $\text{kcal mol}^{-1}$ , $T = 298.15 \text{ K}$ ) of possible intermediates involved in the oxidation of L-prolinate to pirrolidine-2-carboxylate.                                                      | 11   |

**Table S1.** Selected standard reduction potentials for V(V), Cr(VI) and Mn(VII) oxoions in aqueous solution.

| Reaction (acidic solution) |                                                                                                                                                        | E° vs. SHE (298 K) | Ref. |
|----------------------------|--------------------------------------------------------------------------------------------------------------------------------------------------------|--------------------|------|
| Eq. (S1)                   | $[\text{VO}_2^+(\text{aq}) + 2 \text{H}^+(\text{aq}) + \text{e}^- \rightarrow [\text{VO}]^{2+}(\text{aq}) + \text{H}_2\text{O}]$                       | + 1.00 V           | 1    |
| Eq. (S2)                   | $[\text{Cr}_2\text{O}_7^{2-}(\text{aq}) + 14 \text{H}^+(\text{aq}) + 6 \text{e}^- \rightarrow 2 \text{Cr}^{3+}(\text{aq}) + 7 \text{H}_2\text{O}]$     | + 1.33 V           | 2    |
| Eq. (S3)                   | $[\text{MnO}_4^-(\text{aq}) + 8 \text{H}^+(\text{aq}) + 5 \text{e}^- \rightarrow \text{Mn}^{2+}(\text{aq}) + 4 \text{H}_2\text{O}]$                    | + 1.51 V           | 2    |
| Reaction (basic solution)  |                                                                                                                                                        | E° vs. SHE (298 K) | Ref  |
| Eq. (S4)                   | $2 [\text{VO}_4^{3-}(\text{aq}) + 7 \text{H}^+(\text{aq}) + 2 \text{e}^- \rightarrow [\text{HV}_2\text{O}_5]^{2-}(\text{aq}) + 3 \text{H}_2\text{O}]$  | + 2.19 V           | 1    |
| Eq. (S5)                   | $2 [\text{VO}_4^{3-}(\text{aq}) + 4 \text{H}_2\text{O} + 2 \text{e}^- \rightarrow [\text{HV}_2\text{O}_5]^{2-}(\text{aq}) + 7 \text{OH}^-(\text{aq})]$ | - 0.70 V           | 3    |
| Eq. (S6)                   | $[\text{CrO}_4^{2-}(\text{aq}) + 4 \text{H}_2\text{O} + 3 \text{e}^- \rightarrow \text{Cr}(\text{OH})_3(\text{s}) + 5 \text{OH}^-(\text{aq})]$         | - 0.13 V           | 4    |
| Eq. (S7)                   | $[\text{MnO}_4^-(\text{aq}) + 2 \text{H}_2\text{O} + 3 \text{e}^- \rightarrow \text{MnO}_2(\text{s}) + 4 \text{OH}^-(\text{aq})]$                      | + 1.23 V           | 2    |

<sup>1</sup> K. Post, R. G. Robins, *Electrochim. Acta*, 1976, **21**, 401-405.

<sup>2</sup> N. N. Greenwood, A. Earnshaw, *Chemistry of the Elements (Second Edition)*, Butterworth-Heinemann, Oxford, 1997.

<sup>3</sup> Reduction potential calculated for Eq. (S4) at pH = 14 and formally corresponding to the standard reduction potential for Eq. (S5).

<sup>4</sup> A. F. Holleman, E. Wiberg, N. Wiberg, *Inorganic Chemistry*, San Diego 2001, Academic Press.

**Figure S1.** X-ray powder diffraction pattern of the black precipitate obtained from L-proline/ $\text{NH}_4\text{VO}_3$  (black line), and calculated pattern of an equimolar mixture of  $(\text{NH}_4)_2\text{V}_3\text{O}_8$  and  $\text{NH}_4\text{VO}_3$  (red line).

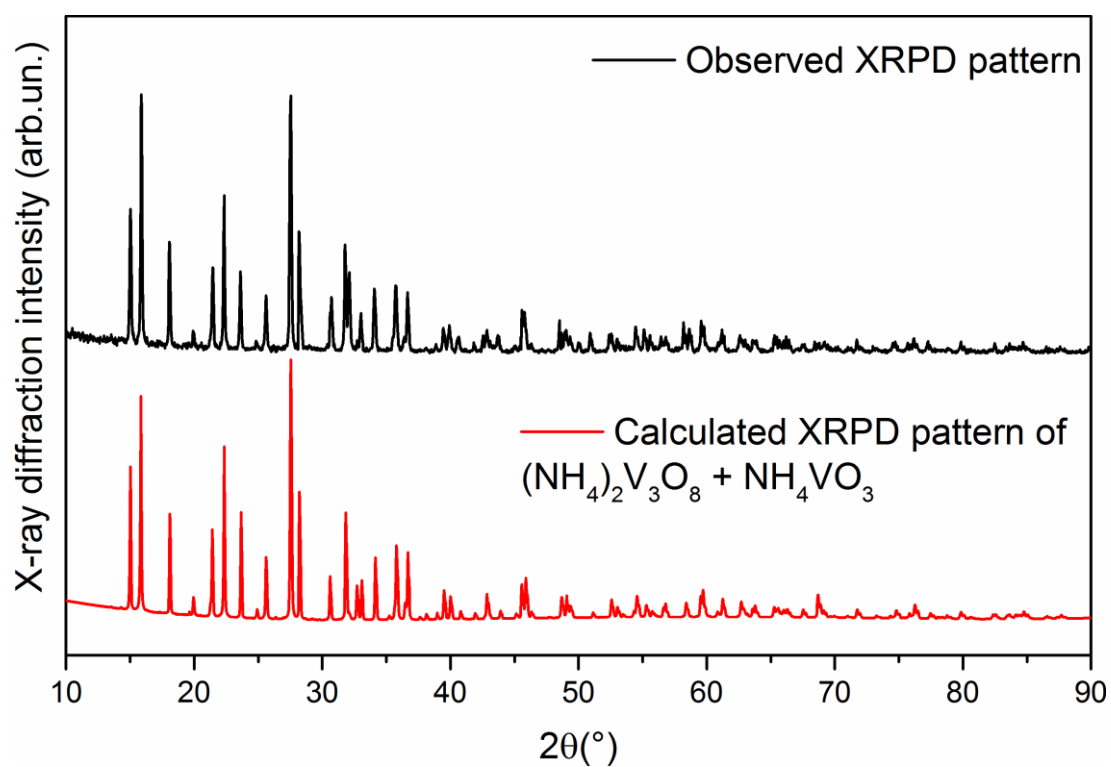

## Determination of pH as a function of the NH<sub>3</sub>/V molar ratio

A suspension of NH<sub>4</sub>VO<sub>3</sub> (229 mg, 1.96 mmol) in H<sub>2</sub>O (ca. 20 mL) was stirred at 70°C until a clear yellow solution was obtained ([V] ≈ 0.1 mol/L). Once cooled to room temperature, stepwise addition of NH<sub>3</sub> (1.18 mol/L in H<sub>2</sub>O) was performed and pH values as a function of the NH<sub>3</sub>/V molar ratio were determined (see Figure S2).

Some relevant values are: NH<sub>3</sub>/V = 0, pH = 7.0; NH<sub>3</sub>/V = 0.1, pH = 8.4; NH<sub>3</sub>/V = 1.0, pH = 9.4; NH<sub>3</sub>/V = 2.1, pH = 9.7; NH<sub>3</sub>/V > 4, pH = 10.0-10.3.

**Figure S2.** Plot of pH as a function of NH<sub>3</sub>/V molar ratio determined with titration of solution 0.1 mol/L in vanadium (from NH<sub>4</sub>VO<sub>3</sub>) with 1.18 mol/L NH<sub>3</sub>. Enlarged view of the 0-3.5 molar ratio region is given below.

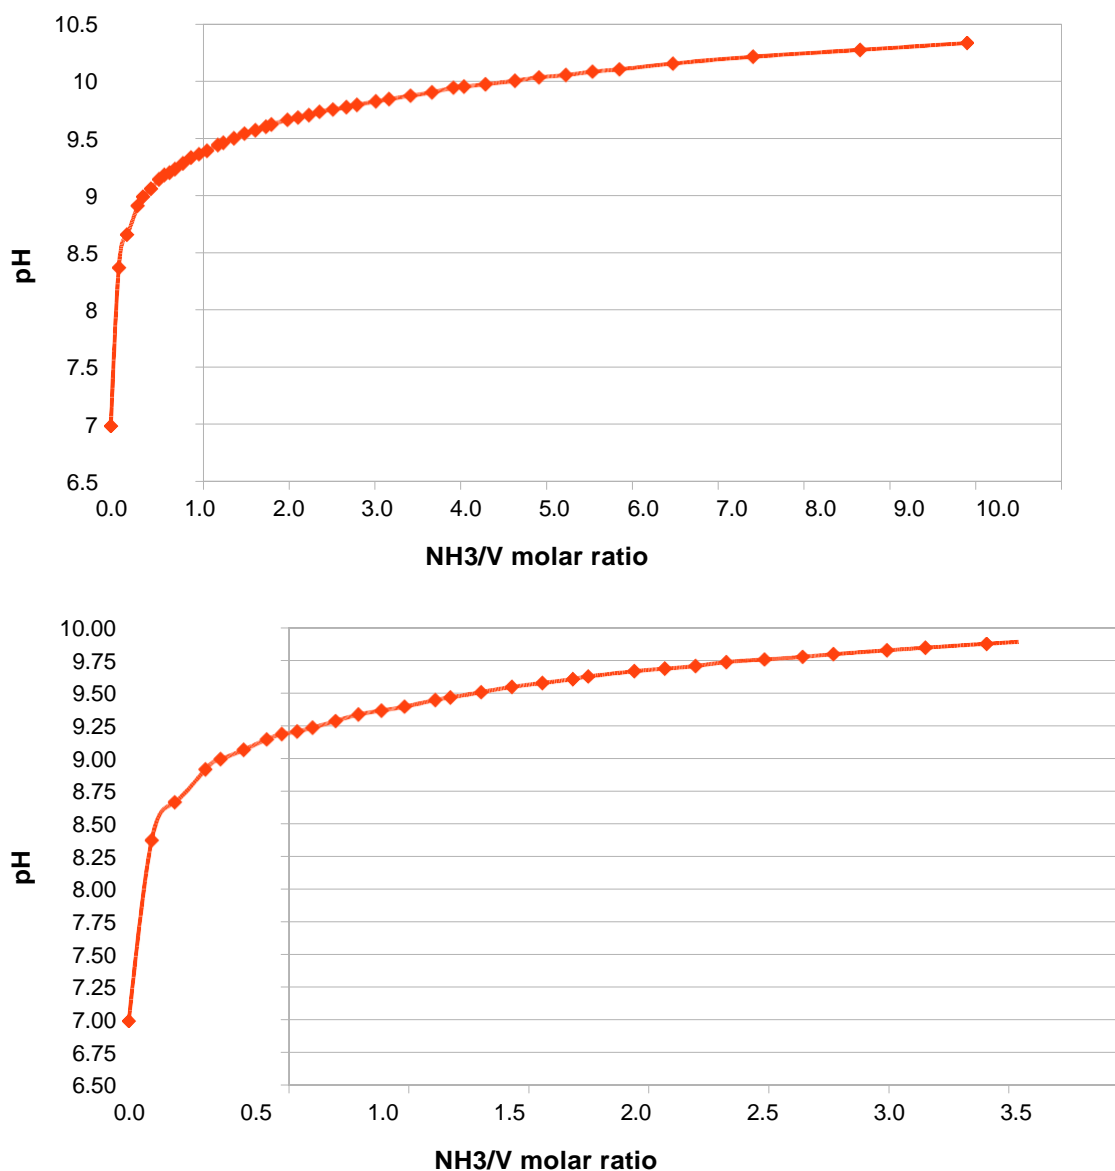

**Table S2.** Experimental optimization of L-pyrroline-2-carboxylate (P2C<sup>-</sup>) yield from the reaction of NH<sub>4</sub>VO<sub>3</sub> with L-Proline.

| Exp. | V concentration <sup>[a]</sup> | NH <sub>3</sub> /V molar ratio (pH <sup>[a]</sup> ) | V/L-Proline molar ratio | Temp. | Reac. Time                          | P2C <sup>-</sup> NMR yield        | Notes                                                     |
|------|--------------------------------|-----------------------------------------------------|-------------------------|-------|-------------------------------------|-----------------------------------|-----------------------------------------------------------|
| #1   | 0.84 mol/L                     | 0.1 (8.4)                                           | 4.0                     | 70°C  | 55 h                                | 0                                 | No reaction, only L-Proline in solution                   |
| #2   | 0.84 mol/L                     | 1.0 (9.4)                                           | 4.0                     | 70°C  | 45 h                                | 40%                               |                                                           |
| #3   | 0.84 mol/L                     | 2.1 (9.7)                                           | 4.0                     | 70°C  | 42 h<br>65 h                        | 20%<br>25%                        |                                                           |
| #4   | 0.84 mol/L                     | 12.2 with NaOH                                      | 4.0                     | 70°C  | 55 h                                | 0                                 | No reaction, only L-Proline in solution                   |
| #5   | 0.84 mol/L                     | 14.3 with NaOH                                      | 4.0                     | 70°C  | 55 h                                | 0                                 | No reaction, only L-Proline in solution                   |
| #6   | 1.6 mol/L                      | 1.0 (9.4)                                           | 1.0                     | 70°C  | 18 h                                | 10%                               |                                                           |
| #7   | 1.6 mol/L                      | 1.0 (9.4)                                           | 2.0                     | 70°C  | 19 h<br>40 h                        | 30%<br>30%                        |                                                           |
| #8   | 1.6 mol/L                      | 1.0 (9.4)                                           | 4.0                     | 70°C  | 12 h<br>31h                         | 35%<br>60%                        |                                                           |
| #9   | 1.6 mol/L                      | 1.0 (9.4)                                           | 8.0                     | 70°C  | 18 h<br>42 h                        | 30%<br>50%                        |                                                           |
| #10  | 0.6 mol/L                      | 1.0 (9.4)                                           | 4.0                     | 70°C  | 25 h<br>45 h                        | 40%<br>50%                        |                                                           |
| #11  | 1.0 mol/L                      | 1.0 (9.4)                                           | 4.0                     | 70°C  | 17 h<br>25 h                        | 45%<br>55%                        |                                                           |
| #12  | 1.6 mol/L                      | 1.0 (9.4)                                           | 4.0                     | 70°C  | 12 h<br>31 h                        | 35%<br>60%                        |                                                           |
| #13  | 2.0 mol/L                      | 1.0 (9.4)                                           | 4.0                     | 70°C  | 17 h<br>25 h                        | 40%<br>50%                        |                                                           |
| #14  | 1.0 mol/L                      | 1.0 (9.4)                                           | 4.0                     | 70°C  | 1 h<br>17 h<br>25 h<br>46 h<br>67 h | 0<br>45%<br>55%<br>≈ 60%<br>< 40% | Byproducts were detected after 67 h.                      |
| #15  | 1.0 mol/L                      | 1.0 (9.4)                                           | 4.0                     | 100°C | 20.5 h<br>44 h                      | 0                                 | Only L-Proline in solution, but reaction mixture darkened |

[a] Vanadium concentration and pH are only formal values as we are dealing with suspensions. The NH<sub>3</sub>/V titration curve for the evaluation of pH has been obtained at a lower V concentration (0.1 mol/L) when all the vanadate precursor was dissolved (see pag. S4).

## Analysis of vanadate species in the reaction mixture by $^{51}\text{V}$ NMR spectroscopy

The predominant V(V) species within the pH interval 9-10 for concentrated solutions ( $[\text{V}] > 0.1$  mol/L) are  $[\text{HVO}_4]^-$ ,  $[\text{HV}_2\text{O}_7]^{3-}$  and higher-nuclearity oxoanions (tetra- and penta-vanadate species).<sup>2,5</sup> As a matter of fact, a solution prepared with equimolar amounts of  $\text{NH}_3$  and  $\text{NH}_4\text{VO}_3$  ( $[\text{V}] = 0.1$  M,  $\text{pH} = 9.4$ ) showed four  $^{51}\text{V}$  NMR resonances (Figure S3):

i)  $-539$  ppm, typical of  $[\text{HVO}_4]^-$ .<sup>6,7</sup>

ii)  $-565$  ppm, typical of  $[\text{HV}_2\text{O}_7]^{3-}$ .<sup>7,8</sup>

iii)  $-576$  ppm.  $^{51}\text{V}$  NMR signals within the range  $-574$  to  $-578$  ppm have been assigned to the cyclic tetravanadate ion  $[\text{V}_4\text{O}_{12}]^{4-}$ <sup>7,9,10</sup> or alternatively to linear  $\text{V}_4$  species as  $[\text{HV}_4\text{O}_{13}]^{5-}$  or  $[\text{V}_4\text{O}_{13}]^{6-}$ .<sup>5,6,8</sup>

iv)  $-584$  ppm.  $^{51}\text{V}$  NMR signals around  $-585$  ppm have been assigned to the cyclic pentavanadate ion  $[\text{V}_5\text{O}_{15}]^{5-}$ .<sup>7,8,11</sup>

**Figure S3.**  $^{51}\text{V}$  NMR spectrum of a  $\text{pH} = 9.4$  solution prepared with  $\text{NH}_4\text{VO}_3$  ( $[\text{V}] = 0.1$  M) and  $\text{NH}_3$  ( $\text{NH}_3/\text{V}$  molar ratio = 1.0).

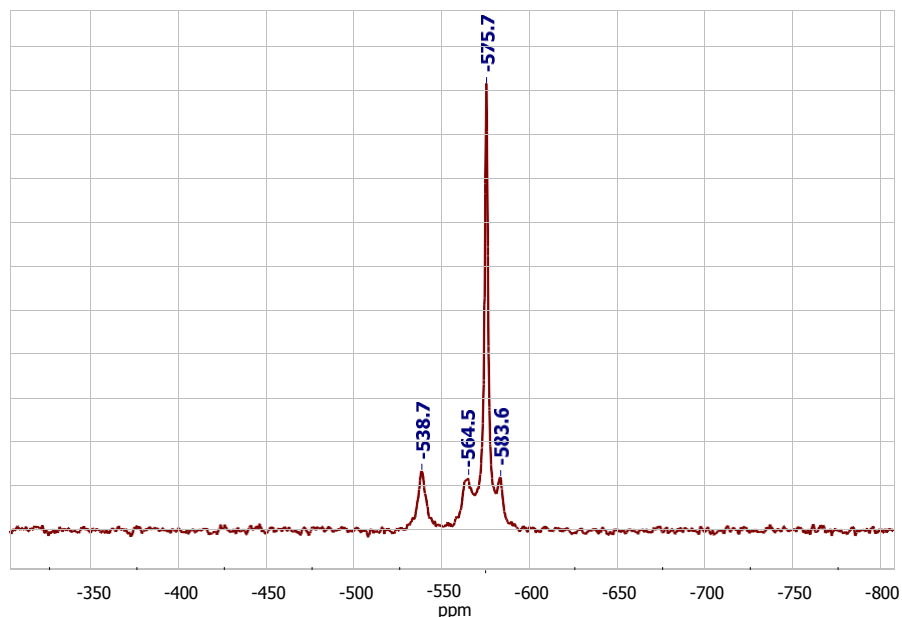

<sup>5</sup> N. McCann, M. Wagner, H. Hasse, *Dalton Trans.*, 2013, **42**, 2622-2628.

<sup>6</sup> E. Heath, O. W. Howarth, *J. Chem. Soc., Dalton Trans.*, 1981, 1105-1110.

<sup>7</sup> D. Rehder, M. Casny, R. Grosse, *Magn. Reson. Chem.* 2004; **42**: 745-749.

<sup>8</sup> D. C. Crans, A. S. Tracey, *The Chemistry of Vanadium in Aqueous and Nonaqueous Solution*, ACS Symposium Series, 1998, 711.

<sup>9</sup> S. E. O'Donnell, M. T. Pope, *J. Chem. Soc., Dalton Trans.*, 1976, 2290-2297.

<sup>10</sup> M. A. Habayeb, O. E. Hileman Jr., *Can. J. Chem.*, **58**, 1980, 2255-2261.

<sup>11</sup> A. M. Amado, M. Aureliano, P. J. A. Ribeiro-Claro, J. J. Teixeira-Dias, *J. Raman Spectros.*, 1993, **24**, 699-703.

During  $^{51}\text{V}$  NMR monitoring of the  $\text{NH}_4\text{VO}_3/\text{L-Proline}/\text{NH}_3$  reaction system (see Experimental), we observed three signals, corresponding to  $[\text{HVO}_4]^-$ ,  $[\text{HV}_2\text{O}_7]^{3-}$  and tetravanadate (Table S3 and Figure S4). The signal due to tetravanadate species was absent at the beginning of the reaction (yellow line in Fig. S2) while becoming the major species during the course of the reaction.

**Table S3 and Figure S4.** Overlay of  $^{51}\text{V}$  spectra at selected time intervals of the  $\text{NH}_4\text{VO}_3/\text{L-Proline}/\text{NH}_3$  reaction system and corresponding pH and  $^{13}\text{C}$  NMR yield of pyrroline-2-carboxylate.

| Reaction time | pH  | P2C yield<br>( $^{13}\text{C}$ NMR) <sup>[a]</sup> | $^{51}\text{V}$ NMR<br>Line colour |
|---------------|-----|----------------------------------------------------|------------------------------------|
| 1 h           | 9.8 | 0 %                                                | Yellow                             |
| 21.5 h        | 9.9 | ≈ 45 %                                             | green                              |
| 24 h          |     |                                                    | cyan                               |
| 26.5 h        | 9.5 | ≈ 55 %                                             | blue                               |
| 33.5 h        |     |                                                    | violet                             |
| 48 h          | 9.6 | ≈ 60%                                              | red                                |

[a] Yields taken from Entry #14 in Table S2 at comparable reaction times.

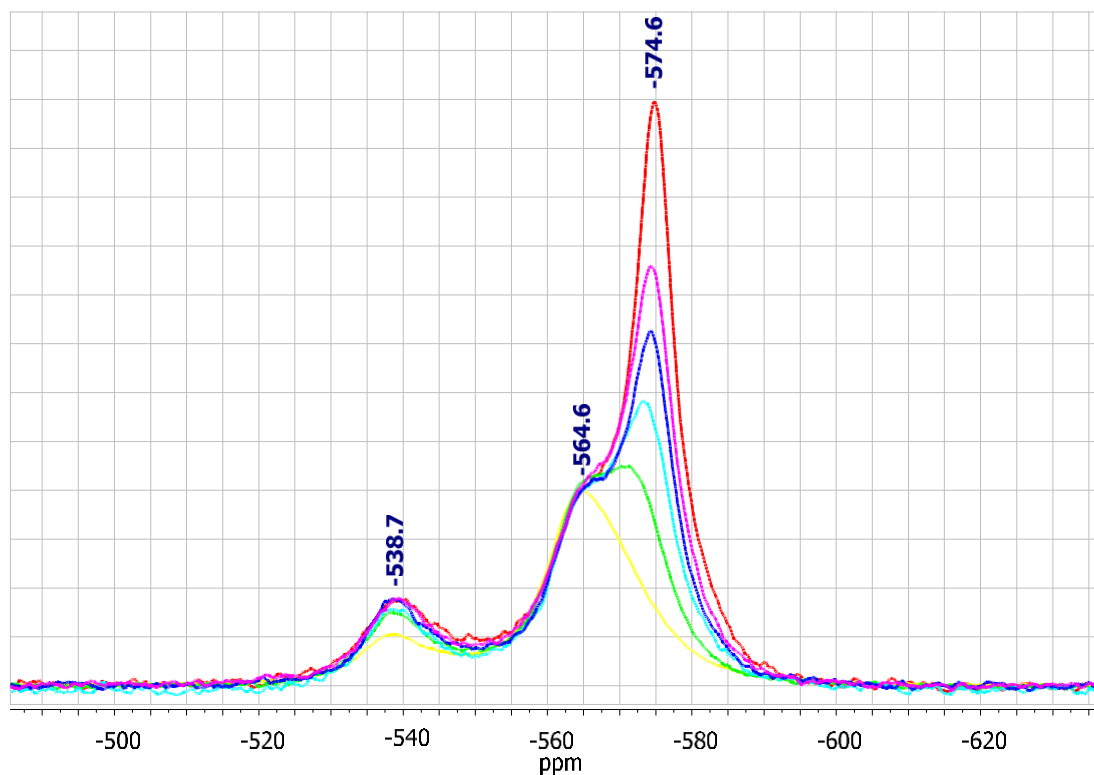

### Calculation of a plausible reduction potential for the V(V)/V(IV) couple under the experimental conditions used in the reactions

It is difficult to provide a meaningful reduction potential for the V(V)/V(IV) couple under conditions relevant to the oxidation of L-Proline, since V(V) species with different nuclearity and protonation state are present in solution (see Pag S7) and can be involved in the redox reaction. The reaction mechanism proposed by DFT calculations considered the transformation of the V(V) cyclic tetravanadate  $[\text{H}_2\text{V}_4\text{O}_{12}]^{2-}$  to the mixed valence V(V)/V(IV) compound  $[\text{H}_4\text{V}_4\text{O}_{12}]^{2-}$  of the same nuclearity. On the other hand, thermodynamic data available in the literature for tetranuclear V(V) and V(IV) species, compiled in Table S4, are related to  $[\text{V}_4\text{O}_{12}]^{4-}$  and  $[\text{V}_4\text{O}_9]^{2-}$ . These ions are the conjugate base of  $[\text{H}_2\text{V}_4\text{O}_{12}]^{2-}$  and the fully reduced (and deprotonated) counterpart of  $[\text{H}_4\text{V}_4\text{O}_{12}]^{2-}$ , respectively, which have been used in DFT calculations.

**Table S4.** Thermodynamic data on  $[\text{V}_4\text{O}_{12}]^{4-}_{(\text{aq})}$  and  $[\text{V}_4\text{O}_9]^{2-}_{(\text{aq})}$  ions in aqueous solution.

|           | Reaction                                                                                                                                                       | $\Delta G^\circ$ (298 K) | Ref. |
|-----------|----------------------------------------------------------------------------------------------------------------------------------------------------------------|--------------------------|------|
| Eq. (S8)  | $[\text{VO}_4]^{3-}_{(\text{aq})} + 2 \text{H}^+_{(\text{aq})} \rightarrow [\text{H}_2\text{VO}_4]^-_{(\text{aq})}$                                            | - 122 kJ/mol             | 1    |
| Eq. (S9)  | $4 [\text{H}_2\text{VO}_4]^-_{(\text{aq})} \rightarrow [\text{V}_4\text{O}_{12}]^{4-}_{(\text{aq})} + 4 \text{H}_2\text{O}$                                    | - 80 kJ/mol              | 5    |
| Eq. (S10) | $4 [\text{VO}_4]^{3-}_{(\text{aq})} + 14 \text{H}^+_{(\text{aq})} + 4 \text{e}^- \rightarrow [\text{V}_4\text{O}_9]^{2-}_{(\text{aq})} + 7 \text{H}_2\text{O}$ | - 846 kJ/mol             | 1    |

Using these data, a standard reduction potential of  $E^\circ = + 0.72 \text{ V}$  (corresponding to  $\Delta G^\circ = -278 \text{ kJ/mol}$ ) can be calculated for the  $\text{V}_4(\text{V}) \rightarrow \text{V}_4(\text{IV})$  transformation reported in Eq. (S11) at 298 K.

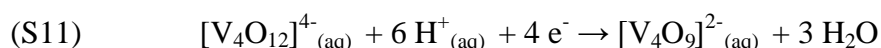

Therefore, on considering the variation of the potential with pH as  $E^{\circ\prime} = E^\circ - 6 \cdot \frac{RT}{\ln 10} \cdot \text{pH}$ , values of  $E^{\circ\prime}$  at different pH were calculated:

For pH = 14,  $E^{\circ\prime} = -0.52 \text{ V}$ , corresponding to the standard reduction potential for Eq. (S12).

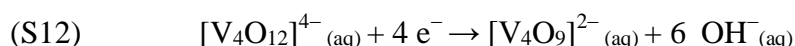

For pH = 10  $E^{\circ\prime} = -0.17 \text{ V}$

For pH = 9  $E^{\circ\prime} = -0.08 \text{ V}$



**Figure S5.** DFT-optimized structure of intermediates **C** and **C-is2** and Gibbs energy difference ( $\text{kcal mol}^{-1}$ ,  $T = 343.15 \text{ K}$ ). C-PCM/ $\omega$ B97X calculations, water as continuous medium. Colour map: light grey, hydrogen; dark grey, carbon; red, oxygen; blue, nitrogen; green, vanadium; light blue, spin density surface (isovalue = 0.01 a.u.).

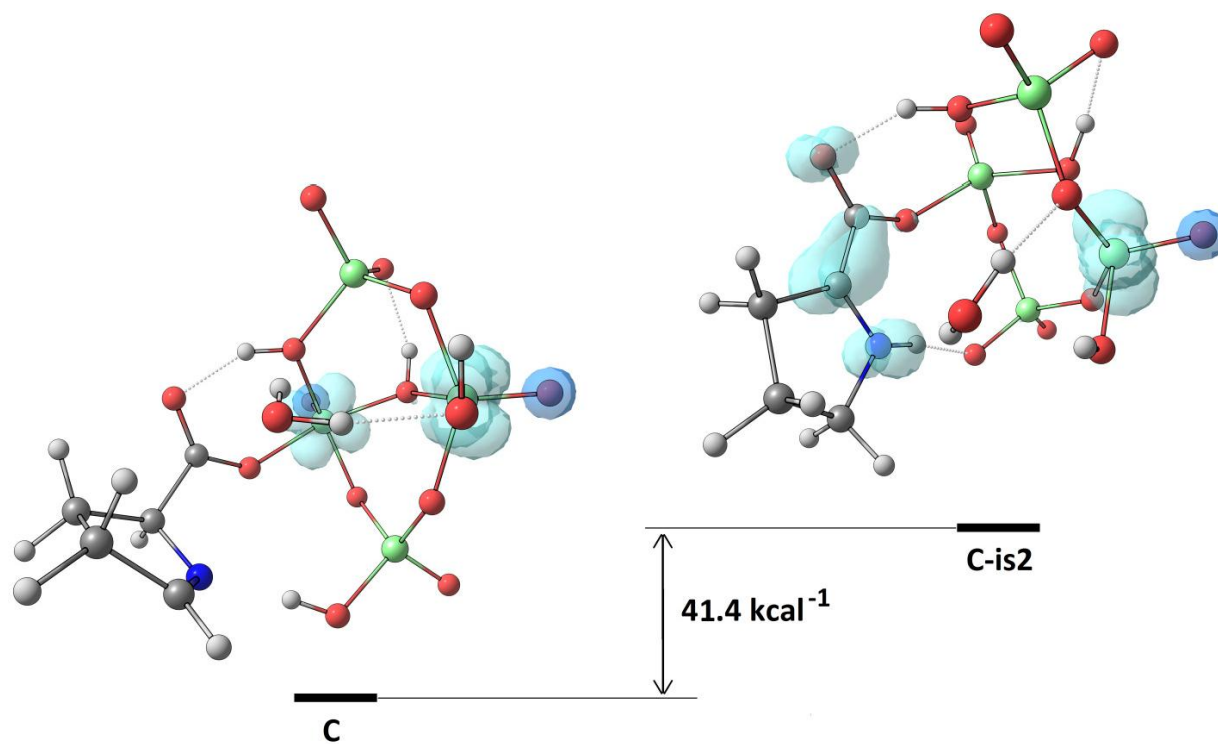

**Figure S6.** DFT-optimized structure of  $[\text{V}_4\text{O}_{10}(\text{OH})_2(\text{sarcosinate})\cdot\text{H}_2\text{O}]^{3-}$ . C-PCM/ $\omega$ B97X calculations, water as continuous medium. Colour map: light grey, hydrogen; dark grey, carbon; red, oxygen; blue, nitrogen; green, vanadium. Selected computed bond lengths:  $\text{V}-\text{O}_{\text{carboxylate}}$  2.057 Å,  $\text{O}_{\text{carboxylate}}\cdots\text{H}$ , 1.558 Å,  $\text{O}-\text{H}(\cdots\text{O}_{\text{carboxylate}})$  1.008 Å. Cartesian coordinates are collected in a separated. xyz file.

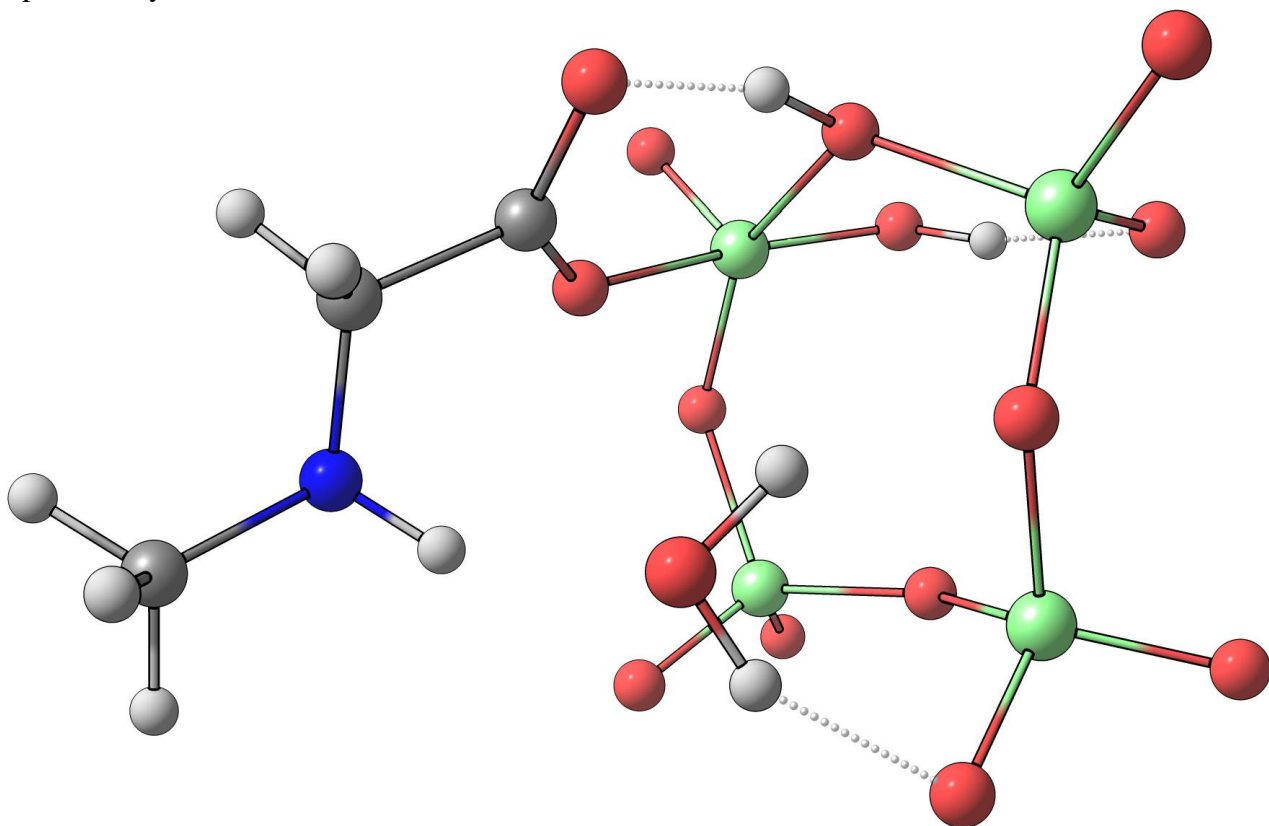

**Figure S7.** Relative Gibbs energy values ( $\text{kcal mol}^{-1}$ ,  $T = 298.15 \text{ K}$ ) of possible intermediates involved in the oxidation of L-prolinate to pyrrolidine-2-carboxylate. C-PCM/ $\omega$ B97X calculations, water as continuous medium. Black line: isotope  $^1\text{H}$  for all hydrogen atoms. Blue line: isotope  $^2\text{H}$  for the N- and O-bonded hydrogen atoms.

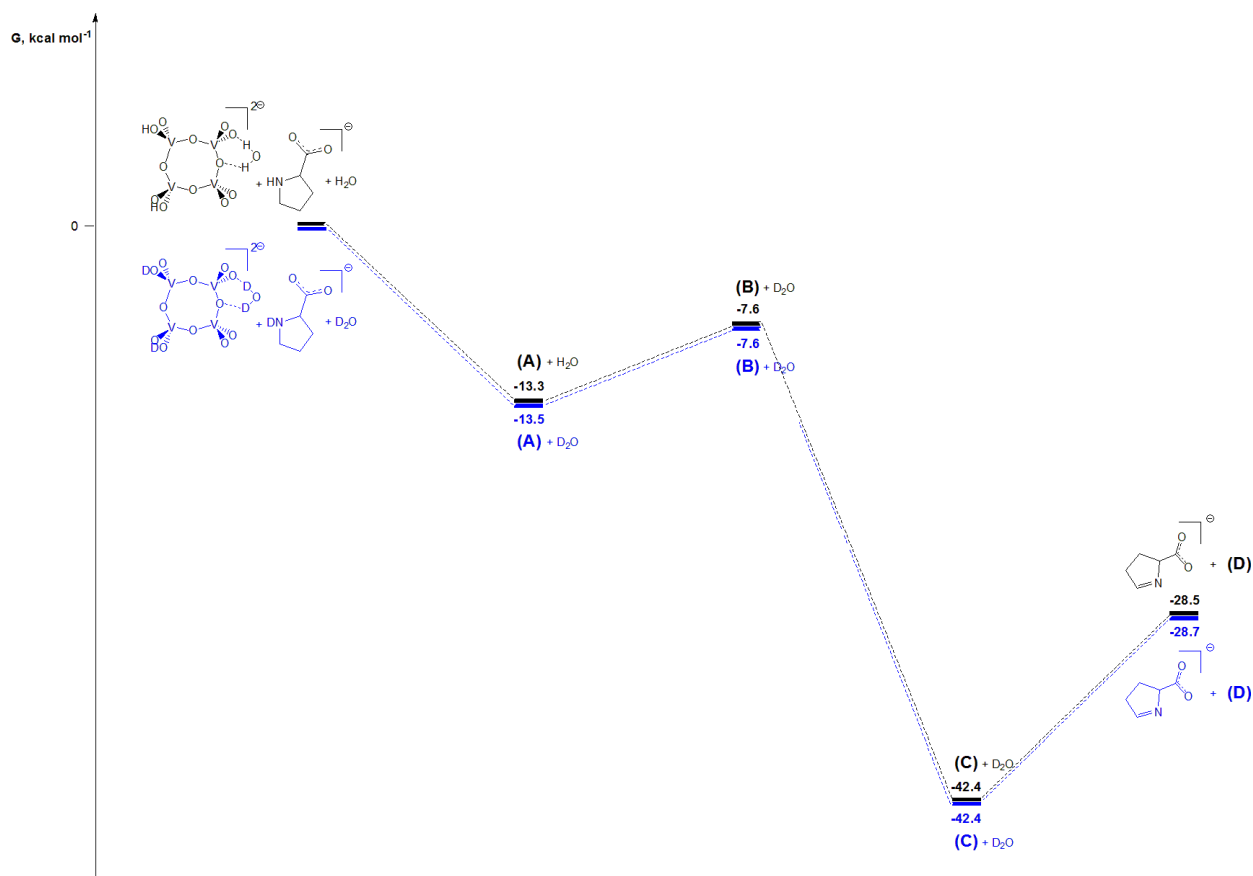

Supplement: c7dt02702h2.pdf [file c7dt02702h2.pdf]
